# Supplementary material for: Psychological characteristics and associations between living kidney transplantation recipients and biologically related or unrelated donors
Source: PubMed Central journal article supplement (PMC7441633; doi:10.1186/s12882-020-02017-y), 2020-08-20
Supplement: 12882_2020_2017_MOESM1_ESM.pdf [file 12882_2020_2017_MOESM1_ESM.pdf]

*Supplementary Tables*

# **Psychological characteristics and associations between living kidney transplantation recipients and biologically related or unrelated donors**

Yujin Lee, M.D.<sup>1†</sup>, Hyewon Park, M.S.<sup>2†</sup>, Hee-Jung Jee, Ph.D.<sup>3</sup>, Heon-Jeong Lee, M.D., Ph.D.<sup>4</sup>, Jun Gyo Gwon, M.D., Ph.D.<sup>5</sup>, Hyeonjin Min, M.D.<sup>6</sup>, Cheol Woong Jung M.D., Ph.D.<sup>5</sup>, Myung-Gyu Kim M.D., Ph.D.<sup>6</sup>, Chul-Hyun Cho, M.D., Ph.D.<sup>7,8\*</sup>

<sup>1</sup>Department of Psychiatry, Seoul Metropolitan Eunpyeong Hospital, Seoul, South Korea

<sup>2</sup>Department of Psychiatry, Samsung Biomedical Research Institute, Seoul, South Korea

<sup>3</sup>Department of Biostatistics, Korea University College of Medicine, Seoul, South Korea

<sup>4</sup>Department of Psychiatry, Korea University College of Medicine, Seoul, South Korea

<sup>5</sup>Department of Surgery, Korea University College of Medicine, Seoul, South Korea

<sup>6</sup>Division of Nephrology, Department of Internal Medicine, Korea University College of Medicine, Seoul, South Korea

<sup>7</sup>Department of Psychiatry, Chungnam National University Sejong Hospital, Sejong, South Korea

<sup>8</sup>Department of Psychiatry, College of Medicine, Chungnam National University, Daejeon, South Korea

† The first two authors contributed equally to this work.

\*Corresponding Author

Chul-Hyun Cho, M.D., Ph.D.

Department of Psychiatry, College of Medicine, Chungnam National University, Daejeon, South Korea

82 Munhwa-ro, Jung-gu, Daejeon 35015, Republic of Korea

Tel: 044-995-4775. E-mail: david0203@gmail.com

**Supplementary Table 1** Correlations of the psychological assessments between biologically related recipients and donors ( $n = 62$ )

|                                      |        | Donor's psychological dimensions |      |       |       |       |       |       |       |        |       |      |       |      |        |        |       |
|--------------------------------------|--------|----------------------------------|------|-------|-------|-------|-------|-------|-------|--------|-------|------|-------|------|--------|--------|-------|
|                                      |        | L                                | F    | K     | Hs    | D     | Hy    | Pd    | Mf    | Pa     | Pt    | Sc   | Ma    | Si   | STAI-S | STAI-T | CES-D |
| Recipient's psychological dimensions | L      | -0.03                            |      |       |       |       |       |       |       |        |       |      |       |      |        |        |       |
|                                      | F      |                                  | 0.20 |       |       |       |       |       |       |        |       |      |       |      |        |        |       |
|                                      | K      |                                  |      | 0.37* |       |       |       |       |       |        |       |      |       |      |        |        |       |
|                                      | Hs     |                                  |      |       | -0.09 |       |       |       |       |        |       |      |       |      |        |        |       |
|                                      | D      |                                  |      |       |       | -0.09 |       |       |       |        |       |      |       |      |        |        |       |
|                                      | Hy     |                                  |      |       |       |       | -0.12 |       |       |        |       |      |       |      |        |        |       |
|                                      | Pd     |                                  |      |       |       |       |       | -0.11 |       |        |       |      |       |      |        |        |       |
|                                      | Mf     |                                  |      |       |       |       |       |       | -0.09 |        |       |      |       |      |        |        |       |
|                                      | Pa     |                                  |      |       |       |       |       |       |       | -0.004 |       |      |       |      |        |        |       |
|                                      | Pt     |                                  |      |       |       |       |       |       |       |        | -0.04 |      |       |      |        |        |       |
|                                      | Sc     |                                  |      |       |       |       |       |       |       |        |       | 0.06 |       |      |        |        |       |
|                                      | Ma     |                                  |      |       |       |       |       |       |       |        |       |      | 0.47* |      |        |        |       |
|                                      | Si     |                                  |      |       |       |       |       |       |       |        |       |      |       | 0.19 |        |        |       |
|                                      | STAI-S |                                  |      |       |       |       |       |       |       |        |       |      |       |      | 0.30   |        |       |
|                                      | STAI-T |                                  |      |       |       |       |       |       |       |        |       |      |       |      |        | 0.12   |       |
|                                      | CES-D  |                                  |      |       |       |       |       |       |       |        |       |      |       |      |        |        |       |

\* $p < 0.05$ .

Note: MMPI-2 = Minnesota Multiphasic Personality Inventory-2; L = Lie; F = Infrequency; K = Defensiveness; Hs = Hypochondriasis; D = Depression; Hy = Hysteria; Pd = Psychopathic Deviate; Mf = Masculinity-Femininity; Pa = Paranoia; Pt = Psychasthenia; Sc = Schizophrenia; Ma = Hypomania; Si = Social Introversion; STAI-S; Spielberger State-Trait Anxiety Inventory-State; STAI-T; Spielberger State-Trait Anxiety Inventory-Trait; CES-D; The Center for Epidemiologic Studies Depression Scale.

**Supplementary Table 2** Correlations of the psychological assessments between biologically unrelated recipients and donors ( $n = 44$ )

|                                      |        | Donor's psychological dimensions |      |      |       |      |       |      |       |       |      |      |      |      |        |        |       |      |
|--------------------------------------|--------|----------------------------------|------|------|-------|------|-------|------|-------|-------|------|------|------|------|--------|--------|-------|------|
|                                      |        | L                                | F    | K    | Hs    | D    | Hy    | Pd   | Mf    | Pa    | Pt   | Sc   | Ma   | Si   | STAI-S | STAI-T | CES-D |      |
| Recipient's psychological dimensions | L      | 0.11                             |      |      |       |      |       |      |       |       |      |      |      |      |        |        |       |      |
|                                      | F      |                                  | 0.28 |      |       |      |       |      |       |       |      |      |      |      |        |        |       |      |
|                                      | K      |                                  |      | 0.11 |       |      |       |      |       |       |      |      |      |      |        |        |       |      |
|                                      | Hs     |                                  |      |      | -0.01 |      |       |      |       |       |      |      |      |      |        |        |       |      |
|                                      | D      |                                  |      |      |       | 0.17 |       |      |       |       |      |      |      |      |        |        |       |      |
|                                      | Hy     |                                  |      |      |       |      | -0.08 |      |       |       |      |      |      |      |        |        |       |      |
|                                      | Pd     |                                  |      |      |       |      |       | 0.09 |       |       |      |      |      |      |        |        |       |      |
|                                      | Mf     |                                  |      |      |       |      |       |      | -0.01 |       |      |      |      |      |        |        |       |      |
|                                      | Pa     |                                  |      |      |       |      |       |      |       | -0.04 |      |      |      |      |        |        |       |      |
|                                      | Pt     |                                  |      |      |       |      |       |      |       |       | 0.24 |      |      |      |        |        |       |      |
|                                      | Sc     |                                  |      |      |       |      |       |      |       |       |      | 0.22 |      |      |        |        |       |      |
|                                      | Ma     |                                  |      |      |       |      |       |      |       |       |      |      | 0.30 |      |        |        |       |      |
|                                      | Si     |                                  |      |      |       |      |       |      |       |       |      |      |      | 0.20 |        |        |       |      |
|                                      | STAI-S |                                  |      |      |       |      |       |      |       |       |      |      |      |      | 0.41   |        |       |      |
|                                      | STAI-T |                                  |      |      |       |      |       |      |       |       |      |      |      |      |        | 0.52*  |       |      |
|                                      | CES-D  |                                  |      |      |       |      |       |      |       |       |      |      |      |      |        |        |       | 0.33 |

\* $p < 0.05$ .

Note: MMPI-2 = Minnesota Multiphasic Personality Inventory-2; L = Lie; F = Infrequency; K = Defensiveness; Hs = Hypochondriasis; D = Depression; Hy = Hysteria; Pd = Psychopathic Deviate; Mf = Masculinity-Femininity; Pa = Paranoia; Pt = Psychasthenia; Sc = Schizophrenia; Ma = Hypomania; Si = Social Introversion; STAI-S; Spielberger State-Trait Anxiety Inventory-State; STAI-T; Spielberger State-Trait Anxiety Inventory-Trait; CES-D; The Center for Epidemiologic Studies Depression Scale.
